# Supplementary material
Source: PubMed Central journal article supplement (PMC2752604)
Supplement: 0805800106_0805800106SI.pdf [file 0805800106_0805800106SI.pdf]

# Supporting Information

Zickfeld et al. 10.1073/pnas.0805800106

## SI Text

Although the exceeding probabilities given in this article have been derived for the long-term (year-2500) temperature response, they also apply, with some approximation, to the instantaneous temperature response. To demonstrate this result, we have conducted two additional simulations with the UVic ESCM, whereby the total emissions compatible with the 2 °C target (674 PgC, which are the allowable cumulative emissions in 2250, i.e., at the time of temperature stabilization; see Fig. 1 in

the main article) are emitted (*i*) as a pulse and (*ii*) according to a scenario with estimated emissions until 2006 and with emissions evolving according to the fastest rate of all SRES marker scenarios (0.35 PgC/yr<sup>2</sup>) until the cumulative emissions limit is reached (at about 2045; see Fig. S1). We find that for the 674-PgC pulse the simulated surface air temperature (SAT) anomaly exceeds the 2 °C target by a maximum of 0.02 °C. For the “fast SRES” scenario, the SAT anomaly exceeds the target by maximally 0.01 °C (see Fig. S1).





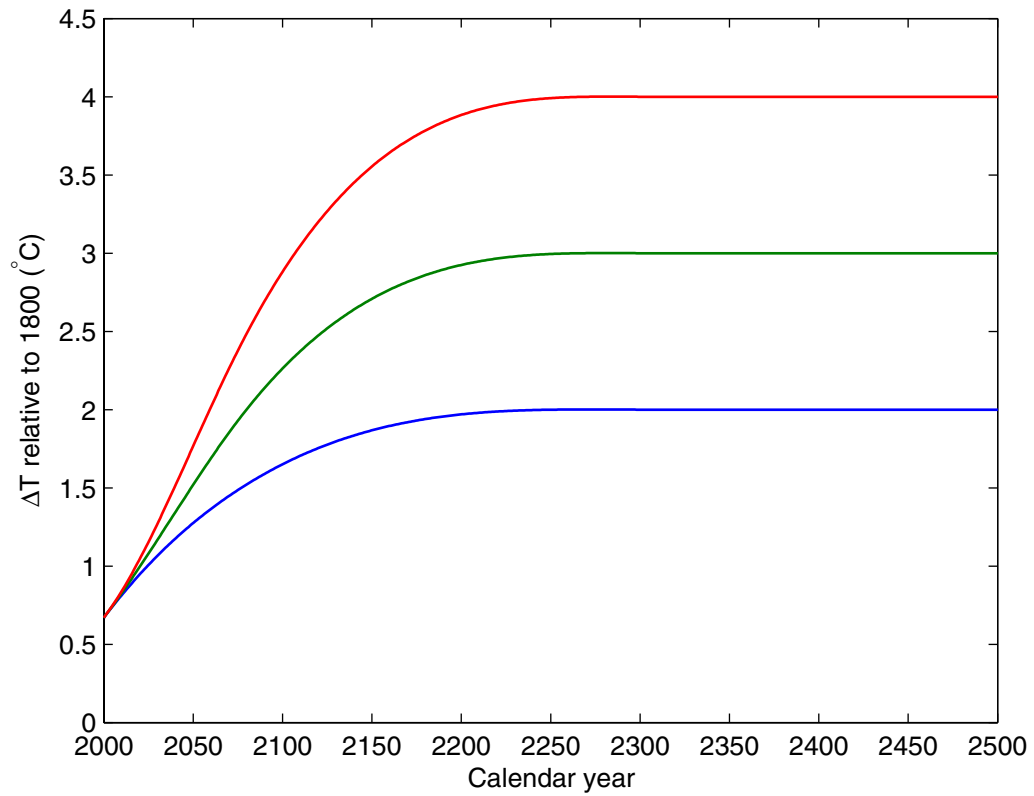

Fig. S3. Standard trajectories stabilizing global mean temperature change at 2 °C, 3 °C, and 4 °C (relative to preindustrial) used in this study.
